# Supplementary material for: Catalyst-free achieving of controllable carbon doping of boron nitride nanosheets by CO molecules: a theoretical prediction
Source: Royal Society of Chemistry journal article supplement (doi:10.1039/c3ra22537b), 2013-01-01

### Supporting Information

**Figure S1:** The spin-density iso-surface at the iso-value of  $0.03 e/\text{\AA}^3$  of the adsorbed  $V^B$  defect by two CO molecules (Coads\_1).

**Figure S1**

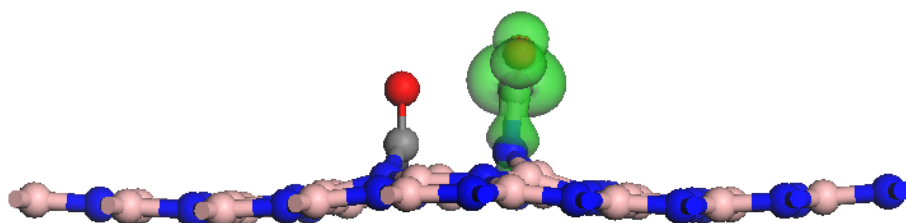

Supplement: c3ra22537b.pdf [file c3ra22537b.pdf]
